# Supplementary figures and images for: Factors Associated with Outcomes of Pre-ART HIV Care
Source: PubMed Central journal article supplement — J Int Assoc Provid AIDS Care. 2018 Mar 14;17:2325958218759602. doi: 10.1177/2325958218759602 (PMC6748496; doi:10.1177/2325958218759602), 2018-03-14

Supplemental Figure 1. Study Sample

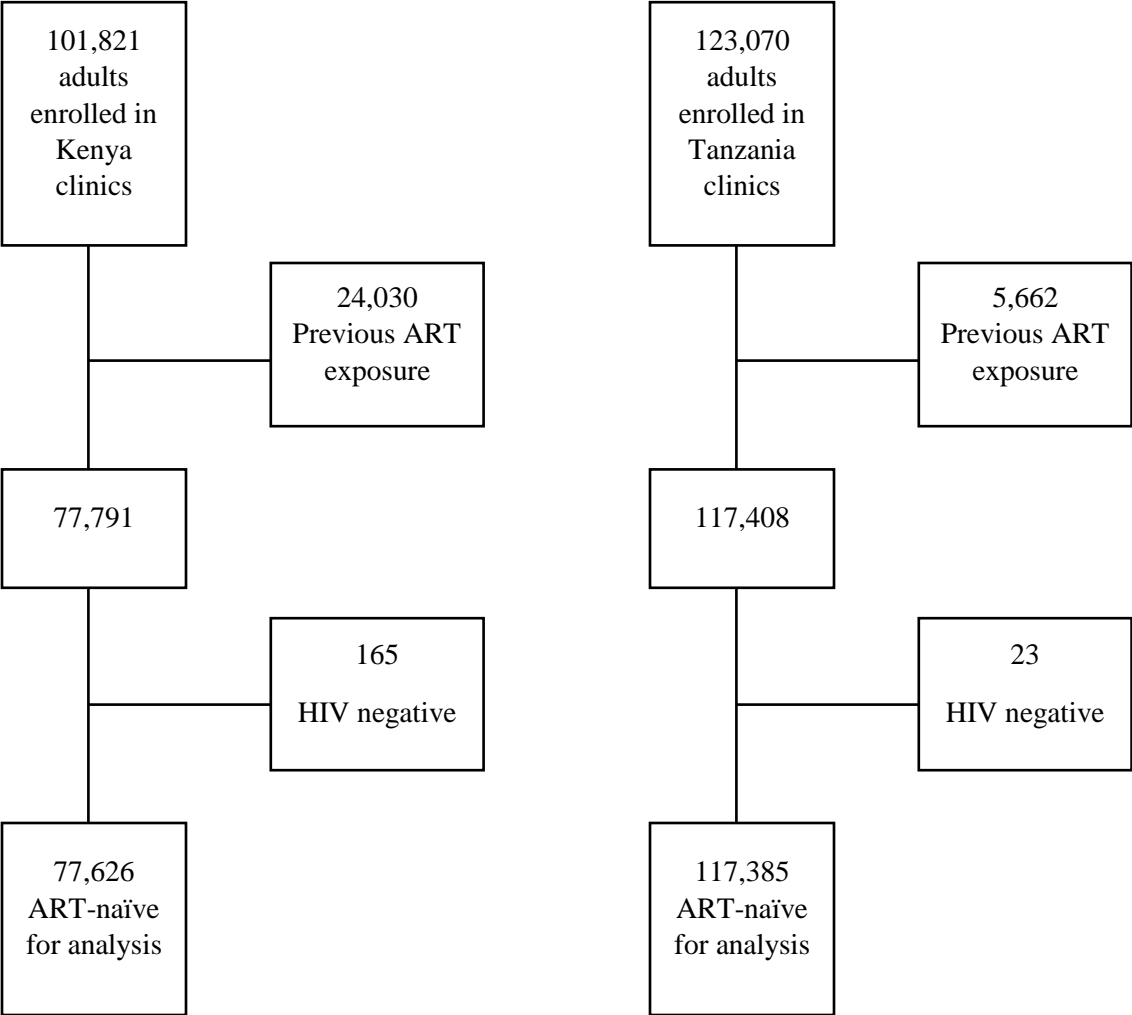

Supplement: SupplmentalFigure1.pdf [file SupplmentalFigure1.pdf]
